# Supplementary material
Source: publisher figshare collection journal article supplement (https://acs.figshare.com/ndownloader/files/4304416)

Execution time

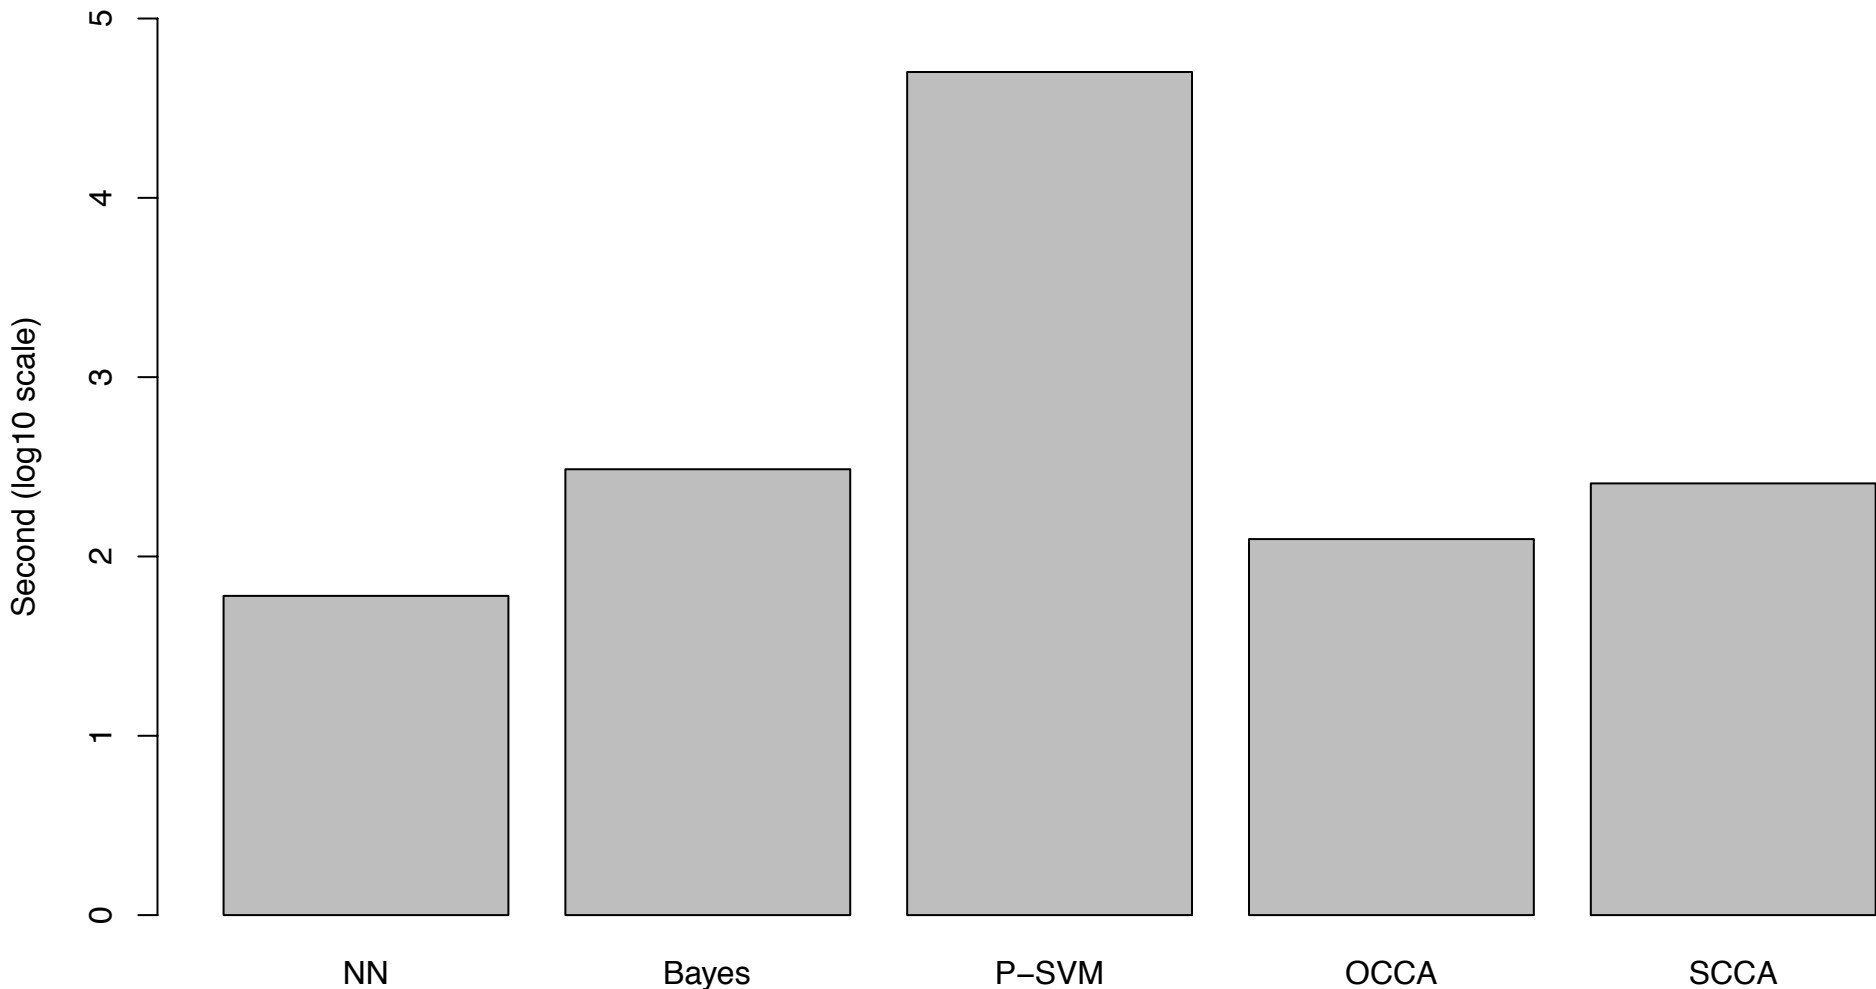

Supplement: Supplementary file 1 [file 4304416]
